# Supplementary material for: Effect of desflurane, sevoflurane or propofol on the incidence of postoperative delirium in older adults undergoing moderate- to high-risk major non-cardiac surgery: study protocol for a prospective, randomised, observer-blinded, clinical trial (RAPID-II trial)
Source: HighWire-hosted journal article supplement (doi:10.1136/bmjopen-2024-092611), 2024-11-01
Supplement: bmjopen-2024-092611supp001_data_supplement.pdf [file bmjopen-2024-092611supp001_data_supplement.pdf]

## Supplementary Online Content

**eAppendix 1.** List of investigators RAPID II Trial

**eAppendix 2.** Definition of moderate- to high-risk major noncardiac surgery

This supplementary material has been provided by the authors to give readers additional information about their work.

**eAppendix 1.** List of investigators RAPID II Trial

1. Medical University of Vienna: Nikolas Adamowitsch; David Emler; Edith Fleischmann; Melanie Fraunschiel; Alexandra Graf; Nicole Hantakova; Beatrix Hochreiter; Kira Margarete Hörl; Katharina Horvath; Barbara Kabon; Helena Langthaler; Magdalena List; Christian Reiterer; Barbara Rossi; Simon Schallmeiner; Mathias Stiefsohn; Alexander Taschner; Giulia Zanzvettor; Florian Wolfgang Zenz; Oliver Zotti;
2. Medical University of Innsbruck: Christine Eckhardt; Iris Emshoff; Christoph Geiger; Nicole Innerhofer; Mario Kofler; Sasa Rajsic; Beatrix Reyer; Barbara Sinner; Susanne Trübsbach; Melanie Widmann;

**eAppendix 2.** Definition of moderate- to high-risk major noncardiac surgery

We defined the following surgeries to meet the criteria for moderate- to high-risk major noncardiac surgery:

- Major general surgery: complex visceral resection, partial or total colectomy, gastrectomy, partial liver resection, pancreas resection, oesophageal resection, anterior rectal resection, retroperitoneal tumour resection, small bowel resection
- Major urologic surgery: prostatectomy, cystectomy, nephrectomy, retroperitoneal tumour resection, major open lymphadenectomy
- Major gynaecologic surgery: retroperitoneal tumour resection, exenteration, cytoreduction surgery, open hysterectomy
- Major orthopaedic surgery: total hip replacement, partial hip replacement, total knee replacement
